# Supplementary material for: Accuracy of cervical cytology: comparison of diagnoses of 100 Pap smears read by four pathologists at three hospitals in Norway
Source: PubMed Central journal article supplement (PMC5576325; doi:10.1186/s12907-017-0058-8), 2017-08-29

## Supplemental

**Table S1. Diagnoses per pathologist (P2–P5) in samples with Normal cytology at UNN**

| Patient | P2 | P3 | P4 | P5 | HPV | Biopsy |
|---------|----|----|----|----|-----|--------|
| 1       | 0  | 0  | 0  | 0  | na  | na     |
| 2       | 1  | 0  | 0  | 0  | na  | na     |
| 3       | 1  | 1  | 0  | 0  | na  | na     |
| 4       | 0  | 0  | 0  | 0  | na  | na     |
| 5       | 0  | 0  | 0  | 0  | na  | na     |
| 6       | 3  | 1  | 1  | 0  | na  | na     |
| 7       | 1  | 0  | 0  | 0  | na  | na     |
| 8       | 3  | 1  | 0  | 0  | na  | na     |
| 9       | 0  | 0  | 0  | 0  | Neg | na     |
| 10      | 1  | 1  | 1  | 0  | na  | na     |
| 11      | 0  | 0  | 0  | 0  | na  | na     |
| 12      | 0  | 0  | 0  | 0  | na  | na     |
| 13      | 0  | 0  | 0  | 0  | na  | na     |
| 14      | 0  | 0  | 0  | 0  | na  | na     |
| 15      | 1  | 0  | 0  | 0  | na  | na     |
| 16      | 0  | 0  | 0  | 0  | na  | na     |
| 17      | 0  | 0  | 0  | 0  | na  | na     |
| 18      | 0  | 0  | 0  | 0  | na  | na     |
| 19      | 0  | 0  | 0  | 0  | na  | na     |
| 20      | 0  | 0  | 0  | 0  | na  | na     |

0 = Normal

1 = ASC-US

2 = LSIL

3 = ASC-H

4 = HSIL

na = not available

Neg = HPV DNA negative (Cobas 4800)

**Table S2. Diagnoses per pathologist (P2–P5) in samples with ASC-US cytology at UNN**

| Patient | P2 | P3 | P4 | P5 | HPV | Biopsy |
|---------|----|----|----|----|-----|--------|
| 21      | 3  | 1  | 0  | 0  | POS | CIN2   |
| 22      | 0  | 0  | 0  | 0  | POS | na     |
| 23      | 1  | 1  | 1  | 0  | POS | na     |
| 24      | 3  | 1  | 1  | 0  | Neg | CIN1   |
| 25      | 2  | 2  | 1  | 0  | Neg | na     |
| 26      | 1  | 1  | 0  | 0  | Neg | na     |
| 27      | 1  | 0  | 0  | 0  | Neg | na     |
| 28      | 3  | 3  | 1  | 4  | Neg | na     |
| 29      | 1  | 1  | 1  | 1  | Neg | na     |
| 30      | 3  | 1  | 0  | 0  | POS | na     |
| 31      | 3  | 0  | 1  | 0  | na  | na     |
| 32      | 0  | 4  | 0  | 4  | POS | na     |
| 33      | 1  | 1  | 0  | 0  | Neg | na     |
| 34      | 1  | 2  | 0  | 0  | POS | CIN1   |
| 35      | 1  | 3  | 0  | 1  | Neg | Normal |
| 36      | 3  | 1  | 0  | 0  | POS | na     |
| 37      | 3  | 0  | 0  | 0  | POS | CIN1   |
| 38      | 1  | 4  | 1  | 4  | Neg | Normal |
| 39      | 1  | 2  | 0  | 1  | Neg | na     |
| 40      | 3  | 4  | 1  | 1  | Neg | na     |

0 = Normal

1 = ASC-US

2 = LSIL

3 = ASC-H

4 = HSIL

na = not available

Neg = HPV DNA negative (Cobas 4800)

POS = HPV DNA positive (Cobas 4800)

CIN1 = cervical intraepithelial neoplasia grade 1 (low grade)

CIN2 = cervical intraepithelial neoplasia grade 2 (high grade)

**Table S3. Diagnoses per pathologist (P2–P5) in samples with LSIL cytology at UNN**

| Patient | P2 | P3 | P4 | P5 | HPV | Biopsy |
|---------|----|----|----|----|-----|--------|
| 41      | 2  | 3  | 2  | 2  | POS | Normal |
| 42      | 2  | 2  | 2  | 2  | POS | CIN1   |
| 43      | 4  | 1  | 1  | 1  | Neg | Normal |
| 44      | 1  | 2  | 0  | 3  | POS | CIN1   |
| 45      | 2  | 2  | 2  | 1  | Neg | na     |
| 46      | 4  | 4  | 3  | 1  | POS | CIN2   |
| 47      | 2  | 2  | 2  | 2  | POS | Normal |
| 48      | 2  | 2  | 2  | 2  | Neg | na     |
| 49      | 2  | 2  | 1  | 1  | POS | CIN1   |
| 50      | 3  | 4  | 0  | 1  | POS | CIN1   |
| 51      | 3  | 3  | 1  | 0  | POS | CIN2   |
| 52      | 3  | 1  | 1  | 3  | POS | CIN1   |
| 53      | 2  | 2  | 1  | 2  | na  | na     |
| 54      | 2  | 3  | 0  | 1  | POS | CIN1   |
| 55      | 1  | 0  | 1  | 2  | POS | Normal |
| 56      | 1  | 0  | 1  | 1  | POS | CIN1   |
| 57      | 1  | 1  | 0  | 2  | POS | CIN2   |
| 58      | 3  | 3  | 0  | 3  | Neg | Normal |
| 59      | 2  | 2  | 1  | 2  | POS | CIN1   |
| 60      | 2  | 1  | 1  | 0  | POS | CIN1   |

0 = Normal

1 = ASC-US

2 = LSIL

3 = ASC-H

4 = HSIL

na = not available

Neg = HPV DNA negative (Cobas 4800)

POS = HPV DNA positive (Cobas 4800)

CIN1 = cervical intraepithelial neoplasia grade 1 (low grade)

CIN2 = cervical intraepithelial neoplasia grade 2 (high grade)

**Table S4. Diagnoses per pathologist (P2–P5) in samples with ASC-H cytology at UNN**

| Patient | P2 | P3 | P4 | P5 | HPV | Biopsy |
|---------|----|----|----|----|-----|--------|
| 61      | 2  | 2  | 2  | 4  | Neg | Normal |
| 62      | 2  | 3  | 0  | 0  | POS | Normal |
| 63      | 2  | 4  | 2  | 3  | POS | CIN1   |
| 64      | 2  | 1  | 1  | 3  | POS | CIN1   |
| 65      | 3  | 2  | 1  | 4  | POS | CIN1   |
| 66      | 4  | 4  | 1  | 4  | na  | CIN3   |
| 67      | 4  | 4  | 0  | 1  | na  | CIN2   |
| 68      | 3  | 4  | 0  | 1  | POS | CIN1   |
| 69      | 1  | 2  | 2  | 1  | POS | CIN1   |
| 70      | 4  | 3  | 3  | 4  | na  | CIN1   |
| 71      | 4  | 4  | 3  | 0  | POS | CIN3   |
| 72      | 3  | 4  | 3  | 1  | POS | CIN2   |
| 73      | 4  | 2  | 3  | 3  | POS | CIN2   |
| 74      | 4  | 0  | 0  | 0  | POS | Normal |
| 75      | 4  | 4  | 2  | 2  | POS | CIN3   |
| 76      | 4  | 2  | 3  | 4  | POS | CIN1   |
| 77      | 4  | 3  | 4  | 4  | POS | CIN2   |
| 78      | 4  | 1  | 4  | 4  | POS | CIN3   |
| 79      | 4  | 4  | 4  | 4  | POS | CIN3   |
| 80      | 4  | 2  | 3  | 4  | POS | CIN2   |

0 = Normal

1 = ASC-US

2 = LSIL

3 = ASC-H

4 = HSIL

na = not available

Neg = HPV DNA negative (Cobas 4800)

POS = HPV DNA positive (Cobas 4800)

CIN1 = cervical intraepithelial neoplasia grade 1 (low grade)

CIN2 = cervical intraepithelial neoplasia grade 2 (high grade)

CIN3 = cervical intraepithelial neoplasia grade 3 (high grade)

**Table S5. Diagnoses per pathologist in samples with HSIL cytology at UNN**

| Patient | P2 | P3 | P4 | P5 | HPV | Biopsy |
|---------|----|----|----|----|-----|--------|
| 81      | 4  | 4  | 3  | 4  | na  | CIN3   |
| 82      | 2  | 2  | 2  | 3  | POS | CIN2   |
| 83      | 4  | 3  | 3  | 4  | na  | CIN2   |
| 84      | 4  | 4  | 4  | 4  | POS | CIN3   |
| 85      | 4  | 4  | 1  | 3  | na  | CIN2   |
| 86      | 4  | 3  | 4  | 1  | Neg | CIN2   |
| 87      | 4  | 4  | 4  | 4  | POS | CIN3   |
| 88      | 4  | 4  | 4  | 4  | POS | CIN3   |
| 89      | 4  | 3  | 4  | 4  | POS | CIN2   |
| 90      | 3  | 2  | 2  | 3  | POS | CIN1   |
| 91      | 4  | 4  | 4  | 4  | POS | CIN2   |
| 92      | 4  | 2  | 3  | 4  | POS | CIN2   |
| 93      | 4  | 3  | 4  | 4  | POS | CIN2   |
| 94      | 4  | 4  | 4  | 4  | POS | CIN2   |
| 95      | 4  | 4  | 4  | 4  | POS | CIN3   |
| 96      | 4  | 3  | 4  | 3  | POS | CIN2   |
| 97      | 4  | 4  | 4  | 4  | na  | CIN3   |
| 98      | 4  | 4  | 4  | 4  | na  | CIN3   |
| 99      | 4  | 1  | 1  | 1  | POS | SCC    |
| 100     | 4  | 4  | 4  | 3  | na  | CIN1   |

0 = Normal

1 = ASC-US

2 = LSIL

3 = ASC-H

4 = HSIL

na = not available

Neg = HPV DNA negative (Cobas 4800)

POS = HPV DNA positive (Cobas 4800)

CIN1 = cervical intraepithelial neoplasia grade 1 (low grade)

CIN2 = cervical intraepithelial neoplasia grade 2 (high grade)

CIN3 = cervical intraepithelial neoplasia grade 3 (high grade)

SCC = squamous cell carcinoma (cervical cancer)

**Figure S1. Distribution of high-grade cytology (ASC-H+) diagnoses by observer (P2–P5) in women with at least one high-grade cytology (N=61)**

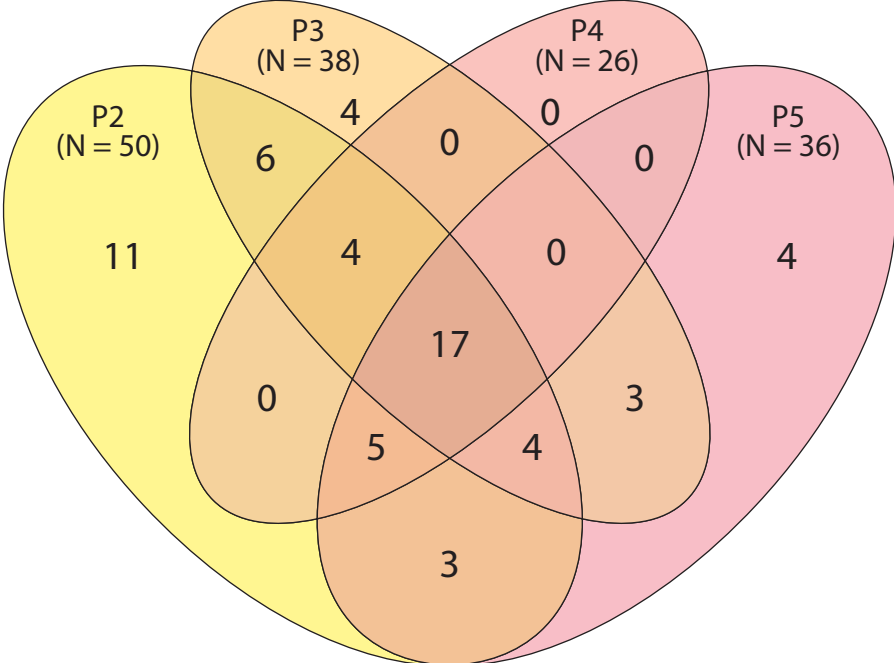

**Figure S2. Distribution of high-grade cytology (ASC-H+) diagnoses by observer (P2–P5) in women with histological CIN2+ in follow-up (N=32)**

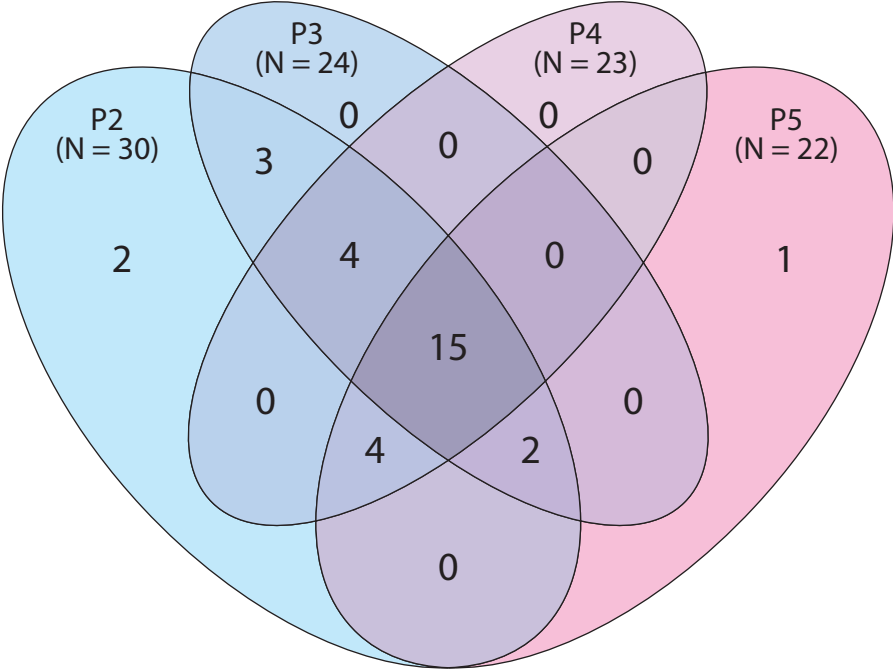

Supplement: 12907_2017_58_MOESM1_ESM.pdf [file 12907_2017_58_MOESM1_ESM.pdf]
